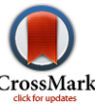

# Chloroform-Assisted Phenol Extraction Improving Proteome Profiling of Maize Embryos through Selective Depletion of High-Abundance Storage Proteins

Erhui Xiong<sup>1</sup>, Xiaolin Wu<sup>1</sup>, Le Yang, Fangping Gong, Fujun Tai, Wei Wang\*

Collaborative Innovation Center of Henan Grain Crops, College of Life Science, Henan Agricultural University, Zhengzhou 450002, China

## Abstract

The presence of abundant storage proteins in plant embryos greatly impedes seed proteomics analysis. Vicilin (or globulin-1) is the most abundant storage protein in maize embryo. There is a need to deplete the vicilins from maize embryo extracts for enhanced proteomics analysis. We here reported a chloroform-assisted phenol extraction (CAPE) method for vicilin depletion. By CAPE, maize embryo proteins were first extracted in an aqueous buffer, denatured by chloroform and then subjected to phenol extraction. We found that CAPE can effectively deplete the vicilins from maize embryo extract, allowing the detection of low-abundance proteins that were masked by vicilins in 2-DE gel. The novelty of CAPE is that it selectively depletes abundant storage proteins from embryo extracts of both monocot (maize) and dicot (soybean and pea) seeds, whereas other embryo proteins were not depleted. CAPE can significantly improve proteome profiling of embryos and extends the application of chloroform and phenol extraction in plant proteomics. In addition, the rationale behind CAPE depletion of abundant storage proteins was explored.

**Citation:** Xiong E, Wu X, Yang L, Gong F, Tai F, et al. (2014) Chloroform-Assisted Phenol Extraction Improving Proteome Profiling of Maize Embryos through Selective Depletion of High-Abundance Storage Proteins. PLoS ONE 9(11): e112724. doi:10.1371/journal.pone.0112724

**Editor:** Silvia Mazzuca, Università della Calabria, Italy

**Received:** September 10, 2014; **Accepted:** October 10, 2014; **Published:** November 11, 2014

**Copyright:** © 2014 Xiong et al. This is an open-access article distributed under the terms of the Creative Commons Attribution License, which permits unrestricted use, distribution, and reproduction in any medium, provided the original author and source are credited.

**Data Availability:** The authors confirm that all data underlying the findings are fully available without restriction. All relevant data are within the paper and its Supporting Information files.

**Funding:** This work was supported by National Natural Science Foundation of China (<http://www.nsf.gov.cn/>; grant no. 31371543, to WW), Plan for Scientific Innovation Talent of Henan Province (<http://www.hnkjt.gov.cn/>; grant no. 144200510012, to WW) and State Key Laboratory of Crop Biology in Shandong Agricultural University (<http://klab.sdau.edu.cn/>; grant no. 2012KF01, to WW). The funders had no role in study design, data collection and analysis, decision to publish, or preparation of the manuscript.

**Competing Interests:** The authors confirm that the co-author, Wei Wang, is a PLOS ONE Editorial Board member. This does not alter their adherence to PLOS ONE Editorial policies and criteria.

\* Email: wangwei@henau.edu.cn

These authors contributed equally to this work.

## Introduction

Maize (*Zea mays* L.) is one of the most important cereal crops worldwide [1]. For a long time, maize has been a staple food of the world's population and a primary nutrient source for animal feed. In recent years, maize has been used for biofuel production [2]. As one of the most frequently harvested organs in agriculture, maize seed contains about 10% proteins, in which 60–80% are storage proteins, mainly existing in embryo as nutrient reservoir for seed germination and early seedling establishment. Likewise, maize embryo is very important for human and livestock nutrition due to its high contents of protein and oil [3].

In maize embryo, vicilin (or globulin-1) is the most abundant, basic (arginine-rich) storage protein. Typically, vicilins are sparsely glycosylated trimeric clusters and each subunit contains two conserved cupin domains, characteristic of Cupin\_2 globulin superfamily [4–6]. Maize vicilin is encoded by a single but polymorphic *Glb1* gene [7–8]. The expression of *Glb1* is embryo specific [7] and regulated by ABA [9]. Recently, maize vicilin was identified as a novel allergen [1]. Due to its high abundance and composition complexity, maize vicilins impede embryo proteomics analysis to a great extent.

Depleting high abundance proteins is often an essential step in enhanced proteomics of complex samples, e.g. depleting storage proteins from legume seeds [10], RuBisCO from leaf extract [11], agglutinin from *Pinellia ternata* tuber extract [12] and albumin and IgG from serum [13–14]. Currently, no methods have been reported to deplete vicilins or abundant storage proteins from maize embryo extracts. We reported here a chloroform-assisted phenol extraction (CAPE) method for vicilin depletion from maize embryo extracts. CAPE is also effective for depletion of abundant storage proteins in dicot (soybean and pea) seeds.

## Materials and Methods

### Plant material and sampling

Maize (*Zea mays* L. cv. Zhengdan 958), soybean (*Glycine max* L.) and pea (*Pisum sativum* L.) seeds were bought from Henan Qiule Seed Industry Science & Technology Co. Ltd (Zhengzhou, China). Mature maize seed consists of three genetically distinct components: embryo, endosperm and coat. The embryo is the young organism before it emerges from the seed. Dry maize seeds were soaked in water for 2 h to soften starchy endosperm. Then, the embryos were manually took out, rinsed and used for protein extraction. Likewise, soybean and pea seeds were soaked in water

for 2 h to remove seed coat and whole embryos were used for protein extraction.

## Reagents

All chemicals used were of analytical grade. High purity deionized water (18 MO.cm) was used throughout the experiment. Chloroform, buffered phenol (pH 8.0) and a cocktail of protease inhibitors were purchased from Sigma-Aldrich Co. LLC (St. Louis, MO, USA). Electrophoresis reagents and IPG strips were obtained from GE Healthcare Life Sciences (Pittsburgh, PA, USA).

## CAPE

The CAPE protocol includes three parts (**Figure 1**). It is designed for 600  $\mu$ l embryo extract to be processed in 2.0 ml Eppendorf tube and can be scaled up for bigger volumes.

**a. Protein extraction.** Embryo tissues (0.1 g fresh weight) were homogenized in a cold mortar in 1.0 ml of buffer containing 0.25 M Tris-HCl (pH 7.5), 1% SDS, 14 mM DTT and a cocktail of protease inhibitors (4°C). *Note: for embryo from developing, young seeds, less extract buffer (e.g. 0.1 g versus 0.5 ml) can be used.* The homogenate was centrifuged at 12,000 g for 10 min (4°C). The resulting supernatant was still murky with a white solid layer floating on top, indicating the presence of large amount of lipids. The supernatant (embryo extract) was centrifuged again as above and subjected to chloroform denaturing.

As comparisons, aliquots of the embryo extract were mixed with equal volume of chloroform or buffered phenol (pH 8.0). After phase separation by centrifugation, proteins in each parts of the mixture were analyzed using SDS-PAGE.

**b. Chloroform denaturing.** Transfer 600  $\mu$ l of the embryo extract to each 2.0 ml Eppendorf tube and add chloroform at a volume ratio of 1:0 (extract/chloroform), 1:0.25, 1:0.33, 1:0.5 and 1:1, corresponding to 0, 150, 200, 300 and 600  $\mu$ l chloroform, respectively. The mixture was thoroughly mixed by shaking for 10 min at room temperature (RT). *Note: Chloroform denaturing can be extended to 2 h as a pause point.* In the resulting white emulsion, embryo proteins were violently denatured by chloroform. The emulsion, without centrifugation, was directly subjected to phenol extraction.

**c. Phenol extraction.** Add 600  $\mu$ l of buffered phenol (pH 8.0) to each tube containing the chloroform-treated extracts and thoroughly shook for 10 min at RT. *Note: In the presence of chloroform, organic phase was more hydrophobic and heavier, resulting in a quick and clear phase separation, with the organic phase (containing proteins) in the bottom.* After phase separation by centrifugation, the organic phase was transferred to new 2.0 ml Eppendorf tubes (300  $\mu$ l each) and precipitated with 5 volumes of methanol containing 0.1 M ammonium acetate for 1 h (-20°C).

Proteins were precipitated by centrifugation at 15,000 g for 10 min (4°C) and washed with cold acetone and 80% cold acetone each once. Air-dried proteins were dissolved in a buffer of choice. Protein content was determined using Bio-Rad Protein Assay Kit and bovine serum albumin as a standard.

## SDS-PAGE

SDS-PAGE was performed using 13.5% resolving and 5% stacking polyacrylamide gels in a Bio-Rad system (Bio-Rad, Hercules, CA, USA) using the Laemmli buffers (Laemmli 1976). The gels were stained with Coomassie brilliant blue (CBB) R overnight and destained in 7% acetic acid until a clear background.

## Two dimensional gel electrophoresis (2-DE)

Isoelectric focusing (IEF) was performed using 11-cm linear pH 4–7 IPG strips with the Ettan III system (GE Healthcare, USA). About 600  $\mu$ g proteins were loaded into the strip by passive rehydration overnight at RT. The IEF voltage was set at 250 V for 1 h, 1,000 V for 4 h, finally increasing to 8,000 V for 4 h, and holding for 10 h (20°C). Focused strips were equilibrated in Buffer I (0.1 M Tris-HCl, pH 8.8, 2% SDS, 6 M urea, 30% glycerol, 0.1 M DTT) and then in Buffer II (same as Buffer I, but with 0.25 M iodoacetamide instead of DTT) for 15 min each. SDS-PAGE was run on a 13.5% gel with 0.1% SDS in the gel and the running buffer. The gels were stained with 0.1% CBB G-250 overnight and destained in 7% acetic acid until a clear background. Digital images of the gels were processed using PDQUEST software (Bio-Rad).

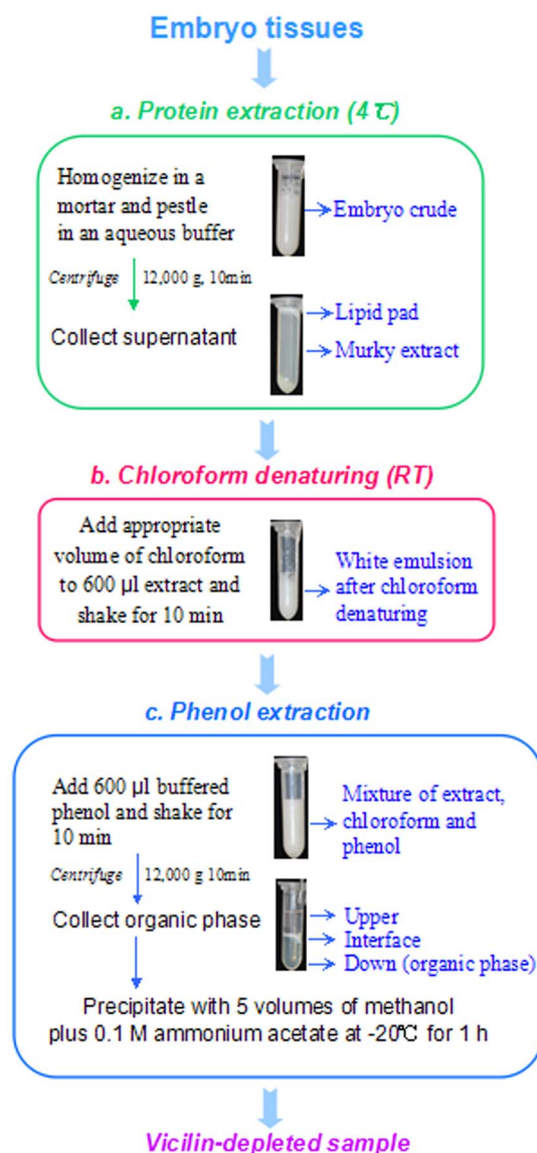

**Figure 1. Schematic overview of the CAPE protocol.** It was demonstrated to process 600  $\mu$ l maize embryo extract in 2.0 ml Eppendorf tube.

doi:10.1371/journal.pone.0112724.g001

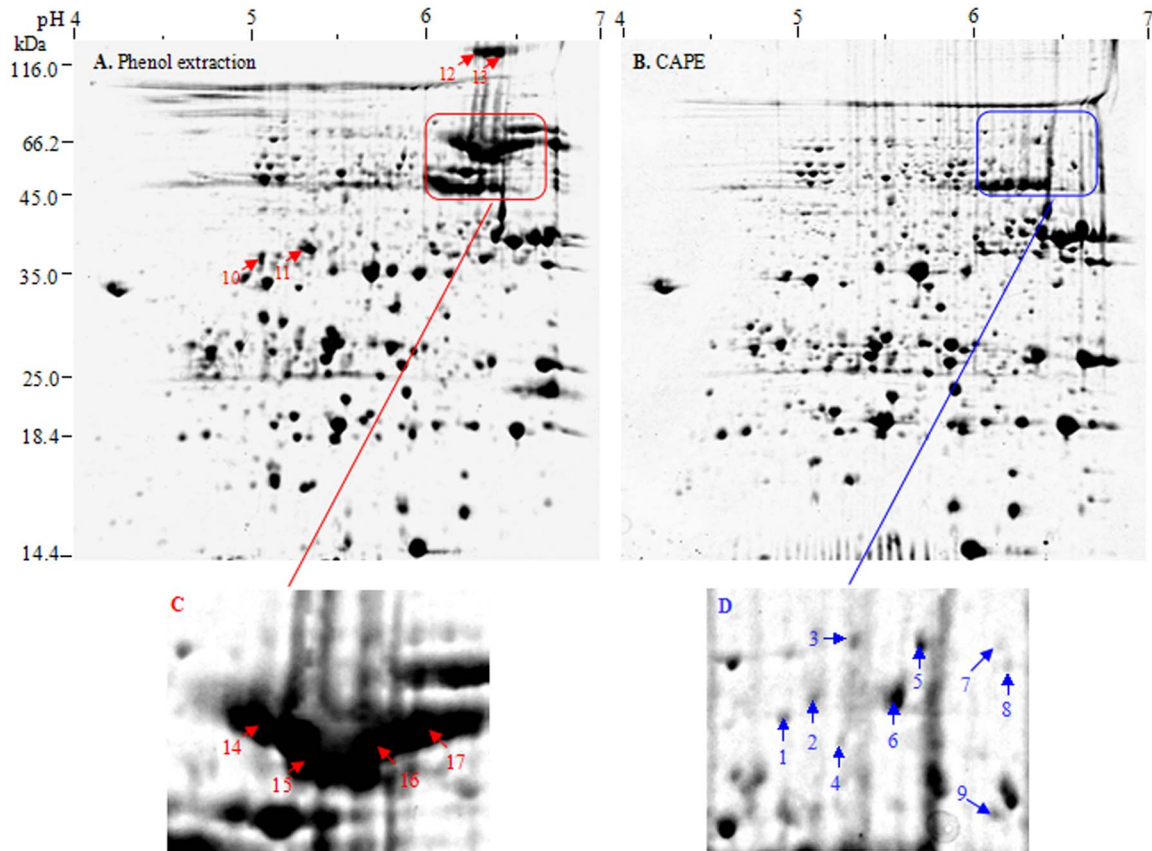

**Figure 2. Depletion of maize vicilins by CAPE.** **A:** Phenol extraction (control). **B:** CAPE. Maize embryo proteins (600  $\mu\text{g}$ ) were separated by IEF with 11-cm linear pH 4–7 IPG strips and then by SDS-PAGE. The magnified regions indicate before and after vicilin depletion. doi:10.1371/journal.pone.0112724.g002

### MS/MS and protein identification

Protein spots of interest were reduced (10 mM DTT), alkylated (50 mM iodoacetic acid), and then digested with 20 ng/ $\mu\text{l}$  trypsin for 16 h at 37°C in 50 mM ammonium bicarbonate. The supernatants were vacuum-dried and dissolved in 10  $\mu\text{l}$  of 0.1% trifluoroacetic acid, and 0.5  $\mu\text{l}$  of the solution was added onto a matrix consisting of 0.5  $\mu\text{l}$  of 5 mg/ml 2, 5-dihydroxybenzoic acid in water: acetonitrile (2:1). The digested fragments were analyzed using a MALDI-TOF/TOF analyzer (ultraflex III, Bruker, Germany). MS/MS spectra were acquired in the positive ion mode and automatically submitted to Mascot 2.2 (<http://www.matrixscience.com>) for peptide mass finger printing against the NCBI nr 20140323 database (38032689 sequences). The taxonomy used was Viridiplantae (green plants) (1749470 sequences). The search parameters were as follows: type of search: MALDI-TOF ion search; enzyme: trypsin; fixed modifications: carbamidomethyl (C); variable modifications: acetyl (N-terminal) and oxidation (M); mass values: monoisotopic; protein mass: unrestricted; peptide mass tolerance:  $\pm 100$  ppm; fragment mass tolerance:  $\pm 0.5$  Da; max missed cleavages: 1; instrument type: MALDI-TOF-TOF. Only significant scores defined by Mascot probability analysis greater than “identity” were considered for assigning protein identity. All of the positive protein identification scores were significant ( $P < 0.05$ , score  $> 50$ ).

### Results and Discussion

#### Development of the CAPE protocol

Currently, methods based on trichloroacetic acid (TCA)/acetone precipitation or phenol extraction are widely used in plant proteomics [15–16]. Most recently, we described in detail sample preparation method integrating TCA/acetone precipitation and phenol extraction for crop proteomics [15]. However, 2-DE image of maize embryo, based on these reported available protocols, was dominated by high-abundance vicilins (**Figure 2**), which inevitably masked low-abundance proteins with similar  $pI$ s and sizes and impeded to dig deep into embryo proteome. In preliminary experiments, we tried many protocols, but all failed to effectively deplete vicilins from maize embryo extracts. Fortunately, we found that chloroform denaturing prior to phenol extraction can effectively and selectively deplete vicilins from maize embryo extract.

We first optimized the CAPE method regarding the amount and treatment time of chloroform before phenol extraction. A ratio 1:1 (v:v) of extract/chloroform was found to be sufficient to deplete vicilins from maize embryo extract, as in the case of soybean and pea seeds (**Figure 3**). As demonstrated by SDS-PAGE, major vicilin (or abundant storage protein) bands (indicated by asterisk) decreased continually in abundance with the increase of chloroform amount. No significant difference of

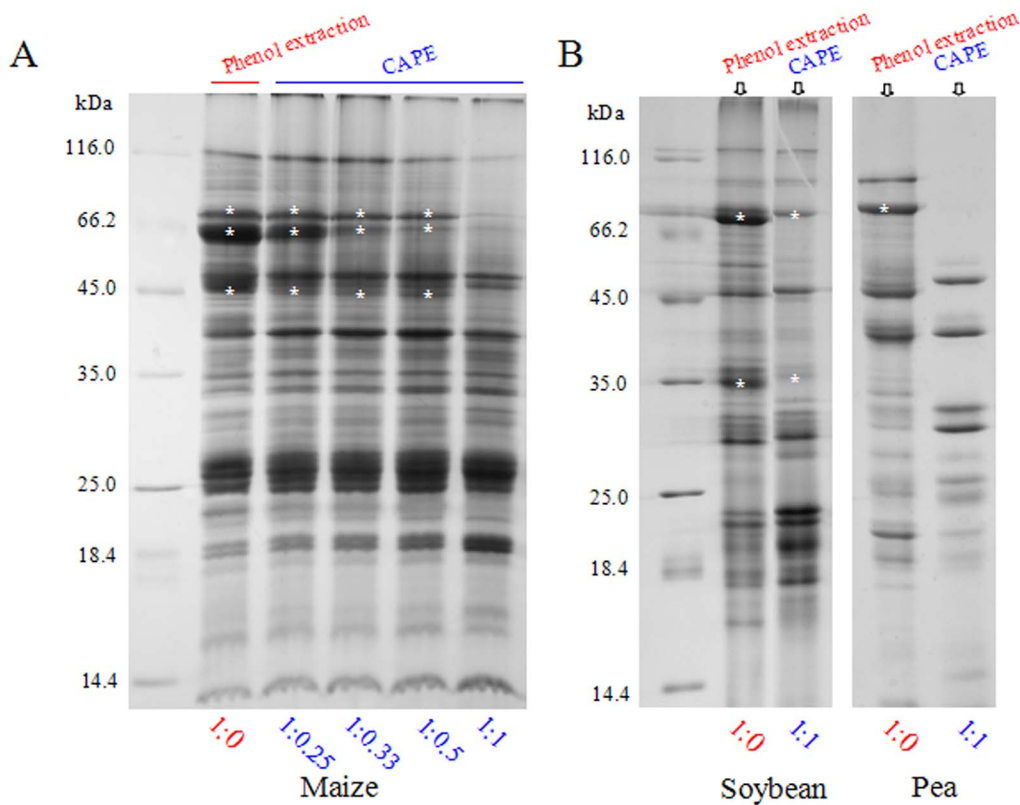

**Figure 3. Optimization of chloroform ratio used in CAPE.** Embryo extracts were mixed well with chloroform at different ratios. Proteins obtained from CAPE and phenol extraction (control) were compared by SDS-PAGE. The asterisks (\*) indicated vicilins or abundant storage proteins. doi:10.1371/journal.pone.0112724.g003

incubation time of chloroform denaturing was observed between 10–30 min. Thus, a ratio of 1:1 (extract/chloroform) and 10 min incubation in CAPE were used in subsequent experiments. For dilute embryo extract, a 1:0.5 (extract/chloroform) was sufficient.

By phenol extraction, the smear region of vicilins was most striking in the top right edge of 2-DE image of maize embryo (**Figure 2**). These vicilins represented at least 20% of total embryo proteins, estimated on their band intensities in 1-D gel. MS/MS analysis (**Table 1**) and sequence alignment by ClustalW2 (<http://www.ebi.ac.uk/Tools/msa/clustalw2/>) (**Figure 4**) confirmed the vicilins identity of these spots. Maize vicilins contain two typical Cupin domains and share 79% homology with soybean vicilins. Obviously, maize vicilins consist of several major isoforms with similar sizes but different pIs (6.1–6.7), consistent with a previous study that vicilin from maize flour is composed of a string of six spots in 2-D gel, all of them allergenic [1]. Probably, this phenomenon resulted from three causes: (a) maize vicilin is encoded by a single but polymorphic *Glb1* gene [7–8], which may contribute the subtle difference of the gene products (protein isoforms); (b) vicilin is a glycoprotein [17] and exists as a heterogeneous mixture after glycosylation; and (c) proteolytic modification occurred during vicilin synthesis also contributes the heterogeneity in vicilin species [18–19].

The selectivity, efficiency and reproducibility of CAPE depletion of maize vicilins was evaluated using 2-DE (**Figure 2**). After vicilin depletion, 665 ( $\pm 5$ ) CBB-stained spots were detected in maize embryo extract, compared to 628 ( $\pm 6$ ) spots without the

depletion. In particular, spots 1–17 (**Figure 2**) were selectively removed or newly detected and other representative 12 spots (spots 18–29, **Figure S1**) were enriched in abundance to an extent after CAPE. Moreover, CAPE was highly reproducible based on the 2-DE images from three independent experiments (**Figure S1**).

The 17 spots mentioned above were chosen from the depletion and control gels for MS/MS identification (**Table 1**). The spots lacked in the depletion gel were almost vicilins, indicating a highly selective depletion of CAPE for maize vicilins. Two smaller (spot 10 and 11) and two bigger vicilins (spot 12 and 13) were also removed by CAPE. After vicilin depletion, several low-abundance proteins (**Figure 2**, the enlarged region C and D) were detectable in the places originally taken by vicilins, including globulin-1 S allele precursor (spots 1–5) and TPA: malate synthase (spot 6), which had 42% and 53% identity with maize vicilin, respectively, according to BLAST analysis (<http://www.uniprot.org/blast/>).

The utility of CAPE for dicot seeds was evaluated using soybean seeds. 2-DE analysis showed that CAPE was able to selectively deplete 19 abundant protein spots from soybean embryo extracts. These spots were concentrated in four regions of 2-DE image (**Figure 5, a–d**). Recently, a fractionation technique based on 10 mM  $\text{Ca}^{2+}$  precipitation was used to deplete abundant storage proteins from soybean seeds [10]. Estimated on protein sizes and pIs, the depleted protein spots between CAPE (this study) and  $\text{Ca}^{2+}$  fractionation precipitation [10] are almost the same, especially in the regions **a** and **b**. However, the quality of 2-DE image of soybean embryos after CAPE depletion was superior to that



**Table 1.** MS/MS identification of maize embryo proteins of interest.

| Spot | Protein/Organism                        | Uniprot accession | pI/Mr     | Mascot Score | Matched peptides                                                                                                                                                                                                                                | Coverage (%) | Molecular function          |
|------|-----------------------------------------|-------------------|-----------|--------------|-------------------------------------------------------------------------------------------------------------------------------------------------------------------------------------------------------------------------------------------------|--------------|-----------------------------|
| 1    | Globulin-1 S allele precursor/Maize     | B6UGJ0            | 6.16/50.3 | 204          | K.LLAFGADEEQQVDR.V R.FTHELLEDAVGNR.V                                                                                                                                                                                                            | 6            | Nutrient reservoir activity |
| 2    | Globulin-1 S allele precursor/Maize     | B6UGJ0            | 6.16/50.3 | 179          | K.LLAFGADEEQQVDR.V R.FTHELLEDAVGNR.V                                                                                                                                                                                                            | 6            | Nutrient reservoir activity |
| 3    | Globulin-1 S allele precursor/Maize     | B6UGJ0            | 6.16/50.3 | 301          | R.LLMDVGLANIARG K.LLAFGADEEQQVDR.V R.FTHELLEDAVGNR.V R.FEEFFPVGESPELSVFSDDVIQASFNTR.R                                                                                                                                                           | 15           | Nutrient reservoir activity |
| 4    | Globulin-1 S allele precursor/Maize     | B6UGJ0            | 6.16/50.3 | 140          | K.LLAFGADEEQQVDR.V R.FTHELLEDAVGNR.V                                                                                                                                                                                                            | 6            | Nutrient reservoir activity |
| 5    | Globulin-1 S allele precursor/Maize     | B6UGJ0            | 6.16/50.3 | 284          | K.LLAFGADEEQQVDR.V R.FTHELLEDAVGNR.V R.FEEFFPVGESPELSVFSDDVIQASFNTR.R                                                                                                                                                                           | 13           | Nutrient reservoir activity |
| 6    | TPA: malate synthase, glyoxysomal/Maize | P49081            | 6.25/62.2 | 284          | R.IWNGVFOR.A R.VONWQWL.RH R.DALDFVAGLQ.R.E R.AGQGAGGFPFYL.PK.M R.AGHGDTWAAHPGLIPAIRE R.ATVLVETLPAVFQMNELHEL.R.E                                                                                                                                 | 14           | Malate synthase activity    |
| 7–9  | Unknown protein                         | -                 | -         | -            | Failed to be identified by MS/MS analysis                                                                                                                                                                                                       | -            | -                           |
| 10   | Vicilin/Maize                           | Q03865            | 6.23/66.6 | 137          | R.GPYSLLDORPSIANQHGLYEQADAR.S R.DSNLQVCFEVHADRNEK.V                                                                                                                                                                                             | 7            | Nutrient reservoir activity |
| 11   | Vicilin/Maize                           | Q03865            | 6.23/66.6 | 117          | R.LSPGTAFVVPAGHPFVAVASR.D R.HASEGGHGHWPPLPFGEGR.G R.GPYSLLDORPSIANQHGLYEQADAR.S                                                                                                                                                                 | 11           | Nutrient reservoir activity |
| 12   | Vicilin/Maize                           | Q03865            | 6.23/66.6 | 1014         | R.RPYVFD.R R.VLRPFDEV.S R.L R.VAVLEAN.P.R.S K.OGHVFPVAPAGAVTYLAN.TDGR.K K.ILHTISVPGEFOFF FGPGR.N K.GYAEVCPHR.Q R.GPYSLLDORPSIANQHGLYEQADAR.S R.RSEEEEESEEEQEEAGQGYHTIR.A R.LSPGTAFVVPAGHPFVAVASR.DSNLQVCFEVHADRNEK.V                            | 28           | Nutrient reservoir activity |
| 13   | Vicilin/Maize                           | Q03865            | 6.23/66.6 | 931          | R.RPYVFD.R R.VLRPFDEV.S R.L R.VAVLEAN.P.R.S K.ILHTISVPGEFOFF FGPGR.N R.HASEGGHGHWPPLPFGEGR.PYSLLDORPSIANQHGLYEQADAR.S K.GYAEVCPHR.Q R.RSEEEEESEEEQEEAGQGYHTIR.A R.LSPGTAFVVPAGHPFVAVASR.D                                                       | 25           | Nutrient reservoir activity |
| 14   | Vicilin/Maize                           | Q03865            | 6.23/66.6 | 759          | R.RPYVFD.R R.VLRPFDEV.S R.L R.SFVWPSHTDAHICVYAEGEGWTTIENGER.R K.ILHTISVPGEFOFF FGPGR.N R.HASEGGHGHWPPLPFGEGR.PYSLLDORPSIANQHGLYEQADAR.S R.RSEEEEESEEEQEEAGQGYHTIR.LSPGTAFVVPAGHPFVAVASR.DSNLQVCFEVHADR.N                                        | 29           | Nutrient reservoir activity |
| 15   | Vicilin/Maize                           | Q03865            | 6.23/66.6 | 1068         | R.RPYVFD.R R.VLRPFDEV.S R.L R.SFVWPSHTDAHICVYAEGEGWTTIENGER.R K.OGHVFPVAPAGAVTYLAN.TDGR.K K.ILHTISVPGEFOFF FGPGR.N R.HASEGGHGHWPPLPFGEGR.PYSLLDORPSIANQHGLYEQADAR.S R.RSEEEEESEEEQEEAGQGYHTIR.A R.LSPGTAFVVPAGHPFVAVASR.D R.DSNLQVCFEVHADRNEK.V | 34           | Nutrient reservoir activity |
| 16   | Vicilin/Maize                           | Q03865            | 6.23/66.6 | 1164         | R.RPYVFD.R R.VLRPFDEV.S R.L R.SFVWPSHTDAHICVYAEGEGWTTIENGER.R K.OGHVFPVAPAGAVTYLAN.TDGR.K K.ILHTISVPGEFOFF FGPGR.N R.HASEGGHGHWPPLPFGEGR.PYSLLDORPSIANQHGLYEQADAR.S R.RSEEEEESEEEQEEAGQGYHTIR.A R.LSPGTAFVVPAGHPFVAVASR.D R.DSNLQVCFEVHADRNEK.V | 34           | Nutrient reservoir activity |
| 17   | Vicilin/Maize                           | Q03865            | 6.23/66.6 | 1180         | K.OGHVFPVAPAGAVTYLAN.TDGR.K R.VLRPFDEV.S R.L K.ILHTISVPGEFOFF FGPGR.N R.RPYVFD.R R.GPYSLLDORPSIANQHGLYEQADAR.S R.RSEEEEESEEEQEEAGQGYHTIR.A R.LSPGTAFVVPAGHPFVAVASR.DSNLQVCFEVHADRNEK.V                                                          | 31           | Nutrient reservoir activity |

doi:10.1371/journal.pone.0112724.t001

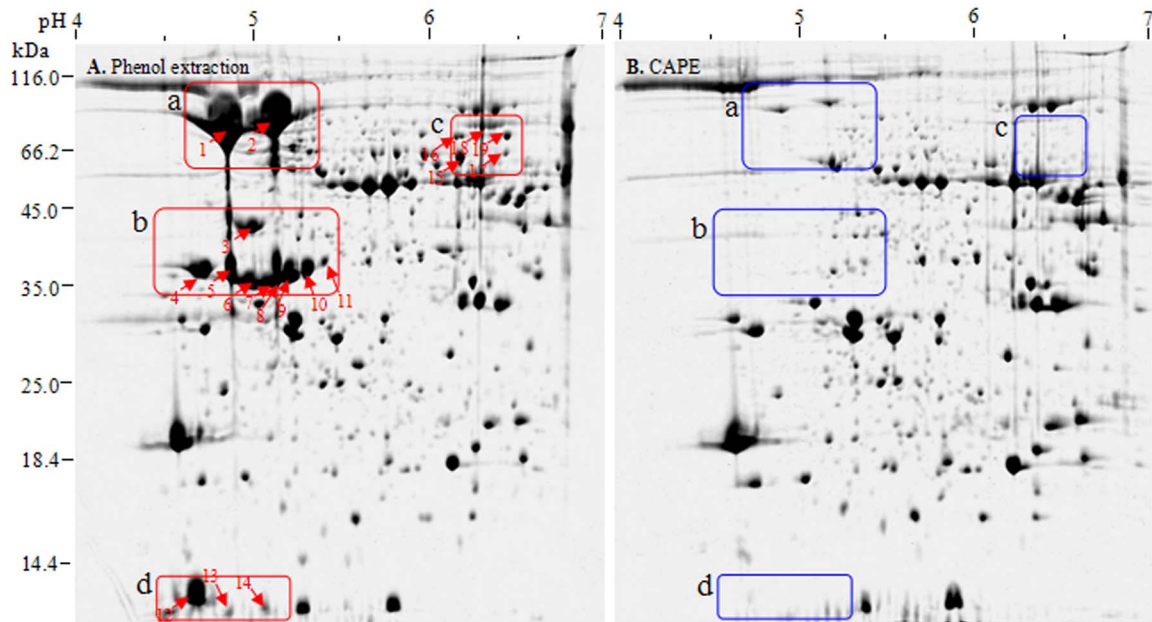

**Figure 5. CAPE depletion of abundant storage proteins in soybean embryo extracts.** **A**, phenol extraction (control); **B**, CAPE. Proteins (600  $\mu$ g) were separated by IEF with 11-cm linear pH 4–7 IPG strips and then by SDS-PAGE (13.5% gel). The red and blue rectangle regions indicate before and after vicilin depletion.  
doi:10.1371/journal.pone.0112724.g005

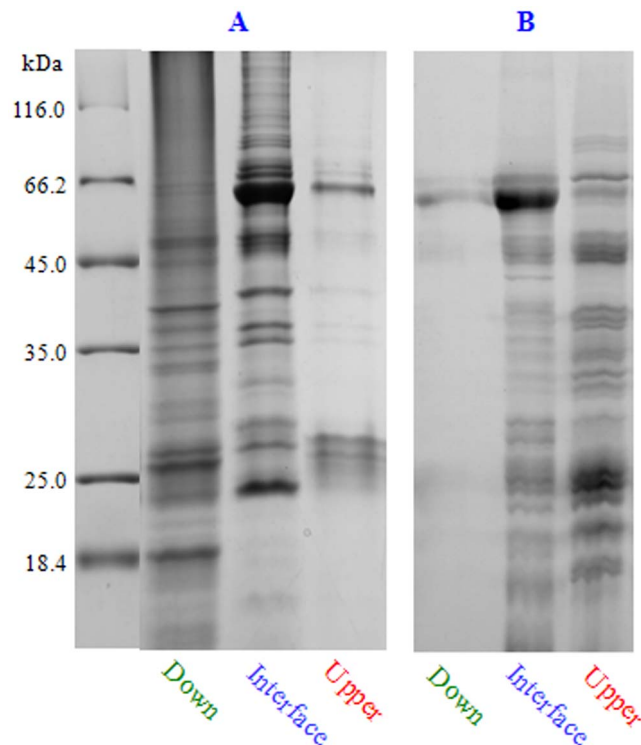

**Figure 6. The effect of chloroform on the behavior of maize vicilins during phase separation.** After phase separation, the proteins from upper phase, interface and down phase were analyzed using SDS-PAGE. **A**, CAPE. **B**, chloroform extraction.  
doi:10.1371/journal.pone.0112724.g006

obtained by  $\text{Ca}^+$  fractionation precipitation. Therefore, CAPE was able to deplete abundant storage proteins from both monocot and dicot embryo extracts.

Obviously, CAPE improved proteome profiling of embryos in two ways: first, it selectively depletes vicilins (or abundant storage proteins) and allows the detection of low-abundance spots which were masked in 2-DE gels; second, it allows greater protein loads and meantime reduces spot ‘tailing’ in 2-DE, thus having potential to resolve more spots, especially using sensitive proteomic approaches (e.g. iTRAQ, DIGE).

#### Rationale of CAPE to selectively deplete abundant storage proteins

The novelty of CAPE is selective depletion of vicilins or abundant storage proteins from embryo extracts. So, the rationale behind CAPE was explored.

We first examined the performance of maize vicilins during phase separation in CAPE. The proteins recovered from upper phase, interface and down phase of the chloroform/phenol/ aqueous mixture were compared using SDS-PAGE (Figure 6). As a result, the overwhelming majority of maize vicilins were found to aggregate in the interface, while only a small amount remained in the upper phase and no vicilin band was detected by CBB staining in the down phase. Obviously, compared to other embryo proteins, maize vicilins were more susceptible to chloroform denaturing and prone to aggregate. These strong aggregates were not resolved in the chloroform/phenol phase of CAPE. However, this was open to question: why were vicilins (or specific abundant storage proteins) depleted selectively by CAPE? Probably, the rationale behind CAPE was due to the specific interaction of chloroform and proteins, depending on the physicochemical property, spatial structure, especially amino acid sequence of proteins.

Likewise, a chloroform/aqueous buffer mixture, maize vicilins aggregated in the interface (Figure 6). As phenol extraction and

other protein extraction protocols, CAPE inevitably resulted in the loss of a small amount of proteins in the interface and the upper phase.

Chloroform is a commonly used protein denaturing agent. Due to highly compatible with phenol and alcohol, chloroform is routinely used in molecular biology to separate proteins from DNA or RNA [20–21]. Moreover, chloroform is an effective organic solvent to extraction membrane protein [22–24]. The CAPE method reported here extends the application of chloroform, especially phenol extraction, in seed protein analysis. In addition, our results showed that vicilins are prone to aggregate in the interface during phase separation in CAPE; therefore, CAPE also provides a simple method to enrich and partially purify vicilins (or specific abundant storage proteins) from embryo extracts for downstream studies.

In conclusion, the present work reports a novel CAPE method for high-abundance storage proteins depletion from both monocot and dicot embryo extracts. The method is simple, low cost and

compatible with proteomic analysis. It can significantly improve embryo proteome profiling and extends the application of chloroform and phenol extraction in proteomics.

## Supporting Information

**Figure S1 Depletion of maize vicilins by CAPE.** A and B represented two groups of independent experiments. Maize embryo proteins were separated by IEF with 11-cm linear pH 4–7 IPG strips and then by SDS-PAGE. C, graphic column of relative spot volume. P, phenol extraction. C, CAPE. (TIF)

## Author Contributions

Conceived and designed the experiments: XLW WW. Performed the experiments: EHX XLW LY. Analyzed the data: WW EHX FPG. Contributed reagents/materials/analysis tools: FJT. Wrote the paper: WW EHX FPG.

## References

1. Fasoli E, Pastorello EA, Farioli L, Scibilia J, Aldini G, et al. (2009) Searching for allergens in maize kernels via proteomic tools. *J Proteomics* 72: 501–510.
2. Colmsee C, Mascher M, Czauarderna T, Hartmann A, Schlüter U et al. (2012) OPTIMAS-DW: A comprehensive transcriptomics, metabolomics, ionomics, proteomics and phenomics data resource for maize. *BMC Plant Biol* 12: 245.
3. Shewry PR, Halford NG (2002) Cereal seed storage proteins: structures, properties and role in grain utilization. *J Exp Bot* 53: 947–958.
4. Shewry PR, Napier JA, Tatham AS (1995) Seed storage proteins: structures and biosynthesis. *Plant Cell* 7: 945–956.
5. Gibbs PE, Strongin KB, McPherson A (1989) Evolution of legume seed storage proteins—a domain common to legumins and vicilins is duplicated in vicilins. *Mol Biol* 6: 614–623.
6. Astwood JD, Silvanovich A, Bannon GA (2002) Vicilins a case study in allergen pedigrees. *J Allergy Clin Immunol* 110: 26–27.
7. Belanger FC, Kriz AL (1989) Molecular characterization of the major maize embryo globulin encoded by the *Glb1* gene. *Plant Physiol* 91: 636–643.
8. Belanger FC, Kriz AL (1991) Molecular basis for allelic polymorphism of the maize *Globulin-1* gene. *Genetics* 129: 863–872.
9. Kriz AL, Wallace MS, Paiva R (1990) Globulin gene expression in embryos of maize viviparous mutants: Evidence for regulation of the *Glb1* gene by ABA. *Plant Physiol* 92: 538–542.
10. Krishnan HB, Oehrle NW, Natarajan SS (2009) A rapid and simple procedure for the depletion of abundant storage proteins from legume seeds to advance proteome analysis: A case study using *Glycine max*. *Proteomics* 9:3174–88.
11. Kim YJ, Lee HM, Wang Y, Wu J, Kim SG et al. (2013) Depletion of abundant plant RuBisCO protein using the protamine sulfate precipitation method. *Proteomics* 13: 2176–2179.
12. Wu XL, Xiong EH, An SF, Gong FP, Wang W (2012) Sequential extraction results in improved proteome profiling of medicinal plant *Pinellia ternata* tubers, which contain large amounts of high-abundance proteins. *PLoS One* 7: e50497.
13. Liu B, Qiu FH, Courtney V, Xu Y, Zhao MZ, et al. (2011) Evaluation of three high abundance protein depletion kits for umbilical cord serum proteomics. *Proteome Science* 9: 24.
14. Bellei E, Bergamini S, Monari E, Fantoni LI, Cuoghi A et al. (2011) High-abundance proteins depletion for serum proteomic analysis: concomitant removal of non-targeted proteins. *Amino Acids* 40: 145–156.
15. Wu XL, Xiong EH, Wang W, Scali M, Cresti M (2014) Universal sample preparation integrating trichloroacetic acid/acetone precipitation and phenol extraction for crop proteomics. *Nat Protoc* 9: 362–374.
16. Wu XL, Gong FP, Wang W (2014) Protein extraction from plant tissues for two-dimensional gel electrophoresis and its application in proteomic analysis. *Proteomics* 14: 645–658.
17. Gerlach JQ, Bhavanandan VP, Haynes PA, Joshi L (2009) Partial characterization of a vicilin-like glycoprotein from seeds of flowering tobacco (*Nicotiana sylvestris*). *J Bot* Doi:10.1155/2009/560394.
18. Higgins TJ, Newbiggin EJ, Spencer D, Llewellyn DJ, Craig S (1988) The sequence of a pea vicilin gene and its expression in transgenic tobacco plants. *Plant Mol Biol* 11: 683–695.
19. Fukuda T, Prak K, Fujioka M, Maruyama N, Utsumi S (2007) Physicochemical properties of native adzuki bean (*Vigna angularis*) 7S globulin and the molecular cloning of its cDNA isoforms. *J Agric Food Chem* 55:3667–3674.
20. Sambrook J, Russell DW (2006) Purification of nucleic acids by extraction with phenol: chloroform. *CSH Protoc* doi:10.1101/pdb.prot4455.
21. Chomczynski P, Sacchi N (2006) Single-step method of RNA isolation by acid guanidinium thiocyanate-phenol-chloroform extraction: Twenty-something years on. *Nat Protoc* 1: 581–585.
22. Mirza SP, Halligan BD, Greene AS, Olivier M (2007) Improved method for the analysis of membrane proteins by mass spectrometry. *Physiol Genomics* 30: 89–94.
23. DI Girolamo F, Ponzi M, Crescenzi M, Alessandrini J, Guadagni F (2010) A simple and effective method to analyze membrane proteins by SDS-PAGE and MALDI mass spectrometry. *Anticancer Res* 30: 1121–1129.
24. Reigada R (2014) Electroporation of heterogeneous lipid membranes. *Biochim Biophys Acta* 1838:814–821.
